# Supplementary material for: Synthesis of magnesium-based Janus micromotors capable of magnetic navigation and antibiotic drug incorporation
Source: Royal Society of Chemistry journal article supplement (doi:10.1039/d0nj00537a), 2020-01-01
Supplement: d0nj00537a1.pdf [file d0nj00537a1.pdf]

New Journal of Chemistry

synthesis of magnesium-based Janus micromotors capable of magnetic navigation and antibiotic drug incorporation

Authors:

Amirhosein Paryab<sup>1</sup>, Hamid Reza Madaah Hosseini<sup>1</sup>, Fatemeh Abedini<sup>1</sup>, Ali Dabbagh<sup>2</sup>.

[amirparyab5@gmail.com](mailto:amirparyab5@gmail.com), [madaah@sharif.edu](mailto:madaah@sharif.edu), [f.abedini@gmail.com](mailto:f.abedini@gmail.com), [Ali.dabbagh@um.edu.my](mailto:Ali.dabbagh@um.edu.my)

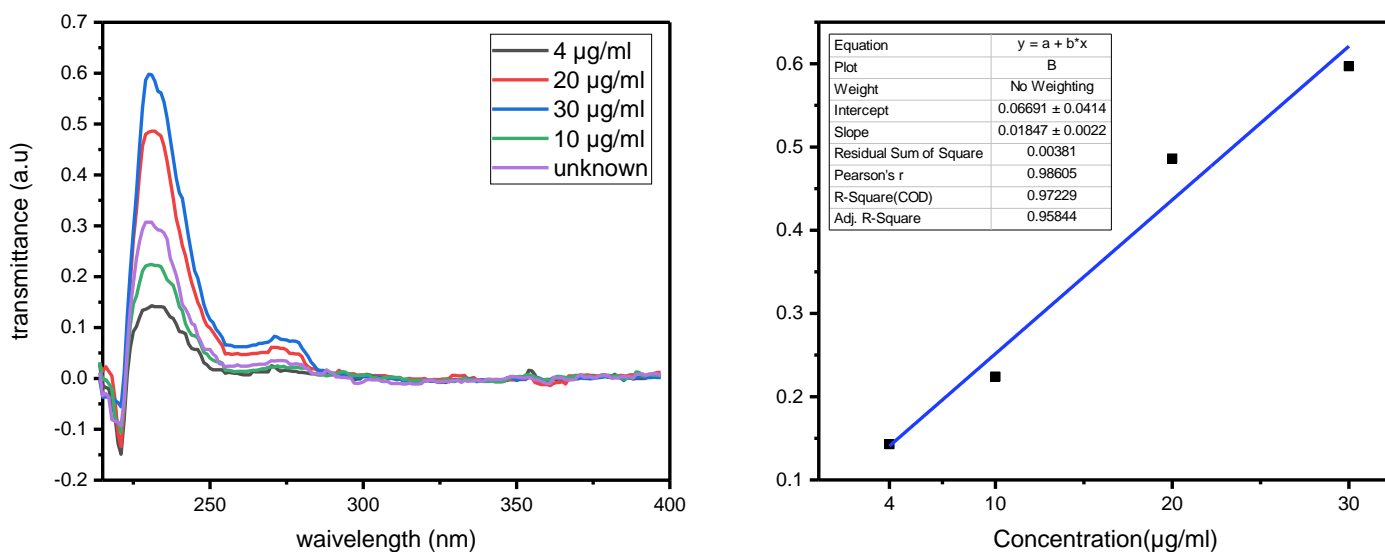

Fig.S1 : UV-VIS spectra of Ampicillin aqueous solutions of unknown concentration and four known concentrations (a). calibration line resulted from intensity of 230 nm peak (b).

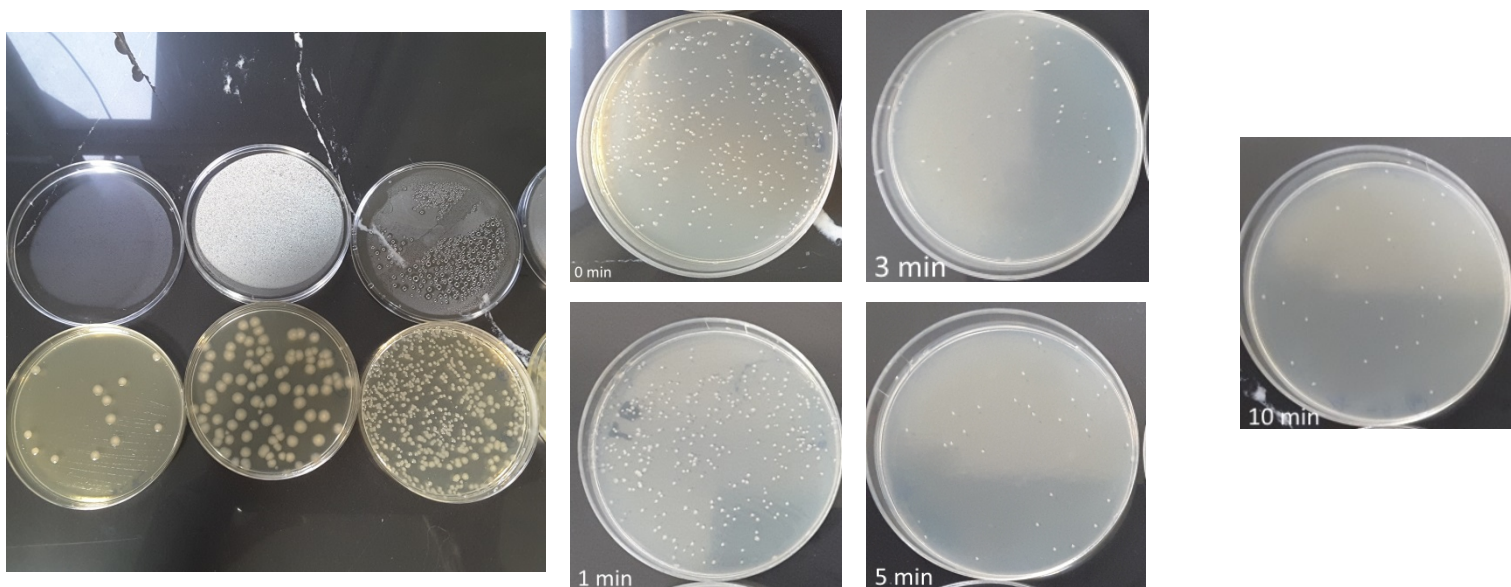

Fig.S2 : plates of bacteria after the test at different contact times.

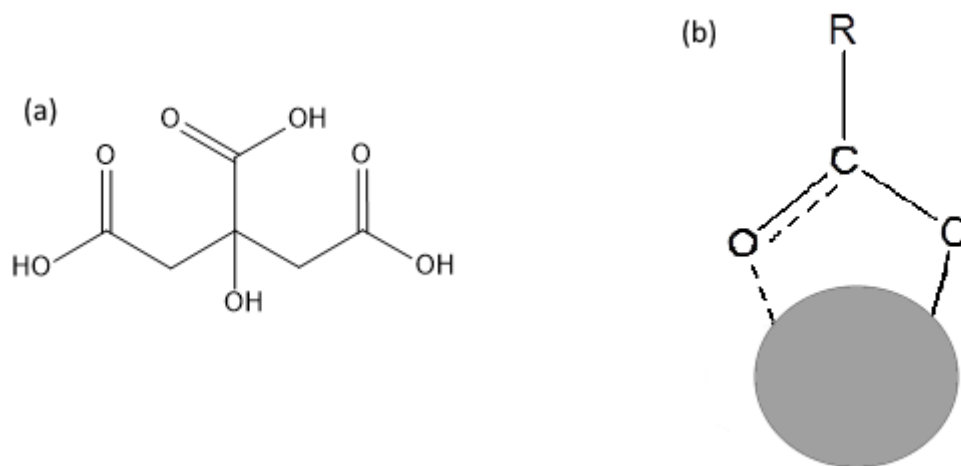

Fig.S3 : structure of citric acid molecule (a) and anticipated structure of a CA- $\text{Fe}_3\text{O}_4$  nanoparticle (b)

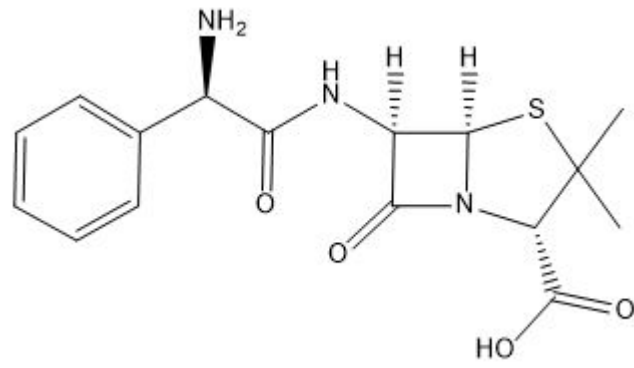

Fig.S4 : structure of Ampicillin molecule
